# Supplementary material for: Citrus limon (L.) Osbeck Fruit Peel Extract Attenuates Carbon Tetrachloride-Induced Hepatocarcinogenesis in Sprague-Dawley Rats
Source: Hindawi journal article supplement (doi:10.1155/2024/6673550), 2024-01-02
Supplement: f1 [file 6673550.f1.pdf]

S1. Synonyms of *Citrus limon* (L.) Osbeck

| NAME                                           | AUTHOR                                                                                                                         | PROTOL<br>OGUE                                                                              | NOMENC<br>LATOR | WFO<br>LINK                     |
|------------------------------------------------|--------------------------------------------------------------------------------------------------------------------------------|---------------------------------------------------------------------------------------------|-----------------|---------------------------------|
| <i>Citrus adamii</i>                           | <u>Risso</u>                                                                                                                   | Fl. Nice :<br>85 (1844)                                                                     |                 | <u>wfo-<br/>000060<br/>7892</u> |
| <i>Citrus aurantium</i> subsp. <i>bergamia</i> | ( <u>Risso</u> & <u>Poit.</u> ) <u>Engl.</u>                                                                                   | Nat.<br>Pflanzenfa<br>m. 3(4):<br>198 1896                                                  | —               | <u>wfo-<br/>000060<br/>7911</u> |
| <i>Citrus aurantium</i> var. <i>mellarosa</i>  | ( <u>Risso</u> ) <u>Engl.</u>                                                                                                  | Nat.<br>Pflanzenfa<br>m. 3(4):<br>198 1896                                                  | —               | <u>wfo-<br/>000060<br/>7926</u> |
| <i>Citrus aurata</i>                           | <u>Risso</u>                                                                                                                   | Hist. Nat.<br>Prod. Eur.<br>Mér. 1:<br>409 (1826)                                           |                 | <u>wfo-<br/>000060<br/>7943</u> |
| <i>Citrus bergamia</i>                         | ( <u>Risso</u> ) <u>Risso</u> & <u>Poit.</u>                                                                                   | Hist. Nat.<br>Orangers :<br>t. 53-56<br>(1819)                                              |                 | <u>wfo-<br/>000060<br/>7952</u> |
| <i>Citrus bergamia</i> subsp. <i>mellarosa</i> | ( <u>Risso</u> ) <u>D.Rivera</u> , <u>Obón</u> , <u>S.Ríos</u> , <u>Selma</u> , <u>F.Méndez</u> , <u>Verde</u> & <u>F.Cano</u> | Varied.<br>Tradic.<br>Frutales<br>F Río Segura<br>Cat.<br>Etnobot.<br>Cítricos<br>108. 1998 |                 | <u>wfo-<br/>000060<br/>7953</u> |
| <i>Citrus bergamota</i>                        | <u>Raf.</u>                                                                                                                    | Sylva<br>Tellur. :<br>141 (1838)                                                            |                 | <u>wfo-<br/>000060<br/>7956</u> |
| <i>Citrus limetta</i>                          | <u>Risso</u>                                                                                                                   | Ann. Mus.<br>Hist. Nat.<br>20: 195<br>(1813)                                                |                 | <u>wfo-<br/>000060<br/>8103</u> |
| <i>Citrus limetta</i> subsp. <i>murcica</i>    | <u>S.Ríos</u> , <u>D.Rivera</u> , <u>García Lidón</u> & <u>Obón</u>                                                            | Varied.<br>Trad. Frut.<br>Cuenca Río<br>Segura Cat.<br>Etnobot. :<br>133 (1998)             |                 | <u>wfo-<br/>000060<br/>8104</u> |

| NAME                                       | AUTHOR                                                          | PROTOL<br>OGUE                                                                  | NOMENC<br>LATOR | WFO<br>LINK                              |
|--------------------------------------------|-----------------------------------------------------------------|---------------------------------------------------------------------------------|-----------------|------------------------------------------|
| <i>Citrus limettioides</i>                 | <u>Yu.Tanaka</u>                                                | J. Indian<br>Bot. Soc.<br>16: 236<br>(1937)                                     |                 | <a href="#">wfo-<br/>000060<br/>8105</a> |
| <i>Citrus limodulcis</i>                   | <u>D.Rivera</u> , <u>Obón</u> , <u>F.Méndez</u> & <u>S.Ríos</u> | Varied.<br>Trad. Frut.<br>Cuenca Río<br>Segura Cat.<br>Etnobot. :<br>125 (1998) |                 | <a href="#">wfo-<br/>000060<br/>8106</a> |
| <i>Citrus limonelloides</i>                | <u>Hayata</u>                                                   | Icon. Pl.<br>Formosan.<br>8: 16<br>(1919)                                       |                 | <a href="#">wfo-<br/>000060<br/>8107</a> |
| <i>Citrus limonia</i>                      | <u>Osbeck</u>                                                   | Reise<br>Ostindien :<br>250 (1765)                                              |                 | <a href="#">wfo-<br/>000060<br/>8110</a> |
| <i>Citrus limonum</i>                      | <u>Risso</u>                                                    | Ann. Mus.<br>Hist. Nat.<br>20: 201<br>(1813)                                    |                 | <a href="#">wfo-<br/>000060<br/>8112</a> |
| <i>Citrus medica</i> var. <i>limon</i>     | <u>L.</u>                                                       | Sp. Pl. :<br>782 (1753)                                                         |                 | <a href="#">wfo-<br/>000060<br/>8149</a> |
| <i>Citrus medica</i> f. <i>limon</i>       | ( <u>L.</u> ) <u>M.Hiroe</u>                                    | Forest Pl.<br>Hist. Jap.<br>Islands 1:<br>218 (1974)                            |                 | <a href="#">wfo-<br/>000060<br/>8150</a> |
| <i>Citrus medica</i> var. <i>limonum</i>   | ( <u>Risso</u> ) <u>Brandis</u>                                 | Forest Fl.<br>N.W. India —<br>52 1874                                           |                 | <a href="#">wfo-<br/>000060<br/>8151</a> |
| <i>Citrus medica</i> subsp. <i>limonum</i> | ( <u>Risso</u> ) <u>Engl.</u>                                   | Nat.<br>Pflanzenfa<br>m. 3(4):<br>200 1896                                      | —               | <a href="#">wfo-<br/>000060<br/>8152</a> |
| <i>Citrus mellarosa</i>                    | <u>Risso</u>                                                    | Hist. Nat.<br>Prod. Eur.<br>Mérid. 1:<br>405 (1826)                             |                 | <a href="#">wfo-<br/>000060<br/>8163</a> |
| <i>Citrus meyeri</i>                       | <u>Yu.Tanaka</u>                                                | Icon. Jap.<br>Citrus<br>Fruits 1: 91<br>(1946)                                  |                 | <a href="#">wfo-<br/>000060<br/>8164</a> |

| NAME                                           | AUTHOR                                   | PROTOL<br>OGUE                                      | NOMENC<br>LATOR | WFO<br>LINK                    |
|------------------------------------------------|------------------------------------------|-----------------------------------------------------|-----------------|--------------------------------|
| <i>Citrus volkameriana</i>                     | <u>Pasq.</u>                             | Cat. Ort.<br>Bot. Napoli<br>: 29 (1867)             |                 | <a href="#">wfo-0000608322</a> |
| <i>Citrus vulgaris</i>                         | Ferrarius ex <u>Mill.</u>                | —                                                   | —               | <a href="#">wfo-0000608323</a> |
| <i>Citrus vulgaris</i>                         | Ferrarius ex <u>Mill.</u>                | Ann. Mus.<br>Nat. Hist.<br>Nat. xx.<br>(1813) 190.  |                 | <a href="#">wfo-0000608324</a> |
| <i>Citrus limonia</i> var. <i>digitata</i>     | <u>Risso</u>                             | Hist. Nat.<br>Orang. ?<br>1813                      | —               | <a href="#">wfo-0000742401</a> |
| <i>Citrus meyerii</i>                          | <u>Yu.Tanaka</u>                         | Icon. Jap.<br>Citrus<br>Fruits 1: 91<br>(1946)      |                 | <a href="#">wfo-0001133156</a> |
| <i>Citrus medica</i> subsp. <i>limonia</i>     | ( <u>Risso</u> ) <u>Hook.f.</u>          | Nat.<br>Pflanzenfa<br>m. 3(4):<br>200 1897          | —               | <a href="#">wfo-0001133259</a> |
| <i>Citrus aurantium</i> subsp. <i>bergamia</i> | ( <u>Risso</u> ) <u>Wight &amp; Arn.</u> | —                                                   | —               | <a href="#">wfo-0001259280</a> |
| <i>Citrus medica</i> f. <i>limon</i>           | ( <u>L.</u> ) <u>Hiroë</u>               | —                                                   | —               | <a href="#">wfo-0001284112</a> |
| <i>Citrus medica</i> var. <i>limonum</i>       | ( <u>Risso</u> ) <u>Brandis</u>          | —                                                   | —               | <a href="#">wfo-0001284113</a> |
| <i>Limon vulgaris</i>                          | Ferrarius ex Miller                      | 1754                                                | —               | <a href="#">wfo-0001284114</a> |
| <i>Citrus bergamia</i> var. <i>parva</i>       | <u>Risso</u>                             | Hist. Nat.<br>Prod. Eur.<br>Mérid. 1:<br>404 (1826) |                 | <a href="#">wfo-0001380942</a> |
| <i>Citrus mellarosa</i> var. <i>vulgaris</i>   | <u>Risso</u>                             | Hist. Nat.<br>Prod. Eur.<br>Mérid. 1:<br>405 (1826) |                 | <a href="#">wfo-0001380943</a> |

| NAME                                          | AUTHOR         | PROTOL<br>OGUE                                          | NOMENC<br>LATOR | WFO<br>LINK                     |
|-----------------------------------------------|----------------|---------------------------------------------------------|-----------------|---------------------------------|
| <i>Citrus mellarosa</i> var<br><i>. plena</i> | <u>Risso</u>   | Hist. Nat.<br>Prod. Eur.<br>Mérid. 1:<br>406 (1826)     |                 | <u>wfo-<br/>000138<br/>0944</u> |
| <i>Citrus limon</i> var. <i>po<br/>mpia</i>   | <u>Camarda</u> | Quad. Bot.<br>Amb.<br>Appl. 24<br>(2013): 113<br>(2015) |                 | <u>wfo-<br/>000138<br/>1820</u> |

Culled from World Flora Online
